# Supplementary material for: Nonverbal Behaviors “Speak” Relational Messages of Dominance, Trust, and Composure
Source: PubMed Central journal article supplement (PMC7870468; doi:10.3389/fpsyg.2021.624177), 2021-01-26
Supplement: Table_1.pdf [file Table_1.pdf]

|            |         |         |         |         |         |         |         |         |         |         |
|------------|---------|---------|---------|---------|---------|---------|---------|---------|---------|---------|
| Log        | -       | -       | -       | -       | -       | -       | -       | -       | -       | -       |
| Likelihood | 1,198.7 | 1,217.0 | 1,217.9 | 1,217.7 | 1,217.7 | 1,215.7 | 1,214.8 | 1,217.9 | 1,215.2 | 1,213.7 |
|            | 95      | 35      | 36      | 57      | 69      | 80      | 57      | 49      | 72      | 33      |

Note: + =  $p < .1$ , \* =  $p < .05$ , \*\* =  $p < .01$ , \*\*\* =  $p < .001$

| Model Number | Behavioral Feature  |
|--------------|---------------------|
| 1            | Mean Vocal Loudness |
| 2            | Mean Vocal Pitch    |
| 3            | Mean Head Pitch     |
| 4            | Mean Head Yaw       |
| 5            | Mean Head Roll      |
| 6            | SD AU01             |
| 7            | SD AU02             |
| 8            | SD AU04             |
| 9            | SD AU05             |
| 10           | SD AU06             |



|            |         |         |         |         |         |         |         |         |         |         |
|------------|---------|---------|---------|---------|---------|---------|---------|---------|---------|---------|
| Log        | -       | -       | -       | -       | -       | -       | -       | -       | -       | -       |
| Likelihood | 1,217.3 | 1,214.6 | 1,214.0 | 1,216.5 | 1,206.1 | 1,210.3 | 1,215.4 | 1,215.3 | 1,209.0 | 1,205.5 |
|            | 29      | 18      | 09      | 87      | 01      | 97      | 45      | 89      | 63      | 57      |

Note: + =  $p < .1$ , \* =  $p < .05$ , \*\* =  $p < .01$ , \*\*\* =  $p < .001$

| Model Number | Behavioral Feature |
|--------------|--------------------|
| 11           | SD AU07            |
| 12           | SD AU09            |
| 13           | SD AU10            |
| 14           | SD AU12            |
| 15           | SD AU14            |
| 16           | SD AU15            |
| 17           | SD AU17            |
| 18           | SD AU20            |
| 19           | SD AU23            |
| 20           | SD AU25            |

**Supplementary Table 3: Mixed-effect regression results for nonverbal behaviors related to dominance (Model 21-29)**

|                        | <i>Dependent variable:</i>       |                                  |                                  |                                  |                                  |                                  |                                |                                  |                                  |
|------------------------|----------------------------------|----------------------------------|----------------------------------|----------------------------------|----------------------------------|----------------------------------|--------------------------------|----------------------------------|----------------------------------|
|                        | Dominance                        |                                  |                                  |                                  |                                  |                                  |                                |                                  |                                  |
|                        | 21                               | 22                               | 23                               | 24                               | 25                               | 26                               | 27                             | 28                               | 29                               |
| T2 (Round 1 and 2)     | -0.042<br>(0.074)                | -0.038<br>(0.074)                | -0.038<br>(0.074)                | -0.043<br>(0.073)                | -0.040<br>(0.074)                | -0.037<br>(0.074)                | 0.098<br>(0.119)               | -0.079<br>(0.067)                | -0.035<br>(0.073)                |
| T3 (After Round 2)     | 0.046<br>(0.072)                 | 0.053<br>(0.073)                 | 0.055<br>(0.073)                 | 0.053<br>(0.072)                 | 0.054<br>(0.073)                 | 0.054<br>(0.073)                 | 0.157<br>(0.117)               | 0.005<br>(0.066)                 | 0.039<br>(0.072)                 |
| Game Role (Spy = 1)    | 0.039<br>(0.079)                 | 0.054<br>(0.079)                 | 0.062<br>(0.079)                 | 0.050<br>(0.079)                 | 0.053<br>(0.079)                 | 0.054<br>(0.079)                 | 0.226 <sup>+</sup><br>(0.137)  | 0.062<br>(0.072)                 | 0.049<br>(0.078)                 |
| Gender (Male = 1)      | 0.253 <sup>***</sup><br>(0.051)  | 0.301 <sup>***</sup><br>(0.051)  | 0.254 <sup>***</sup><br>(0.053)  | 0.209 <sup>***</sup><br>(0.053)  | 0.271 <sup>***</sup><br>(0.051)  | 0.270 <sup>***</sup><br>(0.051)  | 0.276 <sup>**</sup><br>*       | 0.173 <sup>***</sup><br>(0.047)  | 0.324 <sup>***</sup><br>(0.051)  |
| Game Experience        | 0.085<br>(0.057)                 | 0.073<br>(0.057)                 | 0.066<br>(0.057)                 | 0.089<br>(0.057)                 | 0.076<br>(0.057)                 | 0.088<br>(0.057)                 | 0.167 <sup>+</sup><br>(0.086)  | 0.073<br>(0.052)                 | 0.074<br>(0.056)                 |
| Native English Speaker | 0.173 <sup>**</sup><br>(0.059)   | 0.182 <sup>**</sup><br>(0.059)   | 0.178 <sup>**</sup><br>(0.059)   | 0.180 <sup>**</sup><br>(0.059)   | 0.176 <sup>**</sup><br>(0.059)   | 0.175 <sup>**</sup><br>(0.059)   | 0.254 <sup>**</sup><br>(0.085) | 0.134 <sup>*</sup><br>(0.055)    | 0.176 <sup>**</sup><br>(0.058)   |
| Game Status            | 0.014<br>(0.018)                 | 0.015<br>(0.018)                 | 0.014<br>(0.018)                 | 0.014<br>(0.018)                 | 0.014<br>(0.018)                 | 0.014<br>(0.018)                 | 0.041 <sup>+</sup><br>(0.024)  | 0.015<br>(0.016)                 | 0.015<br>(0.018)                 |
| Behavioral Feature     | 0.085 <sup>***</sup><br>(0.026)  | 0.075 <sup>**</sup><br>(0.026)   | -0.047 <sup>+</sup><br>(0.026)   | 0.120 <sup>***</sup><br>(0.026)  | 0.069 <sup>**</sup><br>(0.025)   | 0.074 <sup>**</sup><br>(0.025)   | 0.029<br>(0.039)               | 0.340 <sup>***</sup><br>(0.024)  | 0.153 <sup>***</sup><br>(0.025)  |
| T2*Game Role           | -0.259 <sup>*</sup><br>(0.116)   | -0.273 <sup>*</sup><br>(0.116)   | -0.268 <sup>*</sup><br>(0.117)   | -0.253 <sup>*</sup><br>(0.116)   | -0.266 <sup>*</sup><br>(0.117)   | -0.273 <sup>*</sup><br>(0.116)   | -<br>0.544 <sup>**</sup>       | -0.158<br>(0.107)                | -0.282 <sup>*</sup><br>(0.115)   |
| T3*Game Role           | -0.501 <sup>***</sup><br>(0.114) | -0.520 <sup>***</sup><br>(0.114) | -0.525 <sup>***</sup><br>(0.115) | -0.519 <sup>***</sup><br>(0.113) | -0.523 <sup>***</sup><br>(0.114) | -0.522 <sup>***</sup><br>(0.114) | -<br>0.866 <sup>**</sup><br>*  | -0.397 <sup>***</sup><br>(0.105) | -0.487 <sup>***</sup><br>(0.113) |
| Constant               | 3.303 <sup>***</sup><br>(0.077)  | 3.280 <sup>***</sup><br>(0.077)  | 3.302 <sup>***</sup><br>(0.077)  | 3.314 <sup>***</sup><br>(0.077)  | 3.294 <sup>***</sup><br>(0.077)  | 3.288 <sup>***</sup><br>(0.077)  | 3.008 <sup>**</sup><br>*       | 3.353 <sup>***</sup><br>(0.073)  | 3.273 <sup>***</sup><br>(0.077)  |

|                |            |            |            |            |            |            |          |            |            |
|----------------|------------|------------|------------|------------|------------|------------|----------|------------|------------|
| Observations   | 1,041      | 1,041      | 1,041      | 1,041      | 1,041      | 1,041      | 487      | 1,041      | 1,041      |
| Log Likelihood | -1,212.570 | -1,213.697 | -1,216.353 | -1,207.738 | -1,214.276 | -1,213.815 | -587.230 | -1,124.099 | -1,199.900 |

Note: + =  $p < .1$ , \* =  $p < .05$ , \*\* =  $p < .01$ , \*\*\* =  $p < .001$

| Model Number | Behavioral Feature                              |
|--------------|-------------------------------------------------|
| 21           | SD AU26                                         |
| 22           | SD AU45                                         |
| 23           | SD Vocal Pitch                                  |
| 24           | SD Head Pitch                                   |
| 25           | SD Head Yaw                                     |
| 26           | SD Head Roll                                    |
| 27           | Speaking Tempo (i.e., Word Count/Speaking Time) |
| 28           | Count of Turn-at-Talk                           |
| 29           | Mean Turn-at-Talk Duration                      |



|            |         |         |         |         |         |         |         |         |         |         |
|------------|---------|---------|---------|---------|---------|---------|---------|---------|---------|---------|
| Log        | -       | -       | -       | -       | -       | -       | -       | -       | -       | -       |
| Likelihood | 1,102.7 | 1,104.0 | 1,100.7 | 1,103.1 | 1,104.0 | 1,104.1 | 1,104.0 | 1,104.1 | 1,103.7 | 1,104.1 |
|            | 96      | 37      | 91      | 45      | 31      | 59      | 13      | 86      | 22      | 88      |

Note: + =  $p < .1$ , \* =  $p < .05$ , \*\* =  $p < .01$ , \*\*\* =  $p < .001$

| Model Number | Behavioral Feature  |
|--------------|---------------------|
| 1            | Mean Vocal Loudness |
| 2            | SD AU01             |
| 3            | SD AU02             |
| 4            | SD AU04             |
| 5            | SD AU05             |
| 6            | SD AU06             |
| 7            | SD AU07             |
| 8            | SD AU09             |
| 9            | SD AU10             |
| 10           | SD AU12             |





|            |         |         |         |         |         |         |         |         |         |         |
|------------|---------|---------|---------|---------|---------|---------|---------|---------|---------|---------|
| Log        | -       | -       | -       | -       | -       | -       | -       | -       | -       | -       |
| Likelihood | 1,103.2 | 1,102.9 | 1,104.1 | 1,103.6 | 1,103.2 | 1,103.2 | 1,102.8 | 1,103.3 | 1,101.9 | 1,102.3 |
|            | 03      | 81      | 62      | 51      | 52      | 04      | 81      | 04      | 98      | 39      |

Note: + =  $p < .1$ , \* =  $p < .05$ , \*\* =  $p < .01$ , \*\*\* =  $p < .001$

| Model Number | Behavioral Feature |
|--------------|--------------------|
| 11           | SD AU14            |
| 12           | SD AU15            |
| 13           | SD AU17            |
| 14           | SD AU20            |
| 15           | SD AU23            |
| 16           | SD AU25            |
| 17           | SD AU26            |
| 18           | SD AU45            |
| 19           | SD Head Pitch      |
| 20           | SD Head Yaw        |

**Supplementary Table 6: Mixed-effect regression results for nonverbal behaviors related to nervousness (Model 21-25)**

|                        | <i>Dependent variable:</i> |                     |                     |                     |                     |
|------------------------|----------------------------|---------------------|---------------------|---------------------|---------------------|
|                        | Nervousness                |                     |                     |                     |                     |
|                        | 21                         | 22                  | 23                  | 24                  | 25                  |
| T2 (Round 1 and 2)     | -0.152*<br>(0.066)         | -0.152*<br>(0.066)  | -0.143*<br>(0.066)  | -0.150*<br>(0.066)  | -0.151*<br>(0.066)  |
| T3 (After Round 2)     | -0.211**<br>(0.065)        | -0.204**<br>(0.065) | -0.200**<br>(0.065) | -0.210**<br>(0.065) | -0.211**<br>(0.065) |
| Game Role (Spy = 1)    | -0.048<br>(0.071)          | -0.049<br>(0.071)   | -0.053<br>(0.071)   | -0.052<br>(0.071)   | -0.055<br>(0.071)   |
| Gender (Male = 1)      | -0.103*<br>(0.046)         | -0.126**<br>(0.046) | -0.090+<br>(0.046)  | -0.073<br>(0.053)   | -0.094*<br>(0.047)  |
| Game Experience        | -0.051<br>(0.051)          | -0.037<br>(0.051)   | -0.036<br>(0.051)   | -0.034<br>(0.051)   | -0.034<br>(0.051)   |
| Native English Speaker | -0.107*<br>(0.053)         | -0.109*<br>(0.053)  | -0.101+<br>(0.053)  | -0.109*<br>(0.053)  | -0.111*<br>(0.053)  |
| Game Status            | -0.010<br>(0.016)          | -0.010<br>(0.016)   | -0.010<br>(0.016)   | -0.010<br>(0.016)   | -0.010<br>(0.016)   |
| Behavioral Feature     | -0.061**<br>(0.023)        | -0.052*<br>(0.023)  | -0.063**<br>(0.023) | 0.038<br>(0.026)    | 0.032<br>(0.024)    |
| T2*Game Role           | 0.140<br>(0.104)           | 0.140<br>(0.105)    | 0.115<br>(0.105)    | 0.130<br>(0.105)    | 0.135<br>(0.105)    |
| T3*Game Role           | 0.310**<br>(0.102)         | 0.295**<br>(0.103)  | 0.283**<br>(0.103)  | 0.309**<br>(0.103)  | 0.311**<br>(0.103)  |
| Constant               | 2.667***<br>(0.069)        | 2.671***<br>(0.069) | 2.653***<br>(0.069) | 2.647***<br>(0.071) | 2.659***<br>(0.070) |
| Observations           | 1,041                      | 1,041               | 1,041               | 1,041               | 1,041               |
| Log Likelihood         | -1,100.630                 | -1,101.591          | -1,100.470          | -1,103.177          | -1,103.274          |

*Note:* + =  $p < .1$ , \* =  $p < .05$ , \*\* =  $p < .01$ , \*\*\* =  $p < .001$

| Model Number | Behavioral Feature         |
|--------------|----------------------------|
| 21           | SD Head Roll               |
| 22           | Mean Turn-at-Talk Duration |
| 23           | Count of Turn-at-Talk      |
| 24           | Mean Vocal Pitch           |
| 25           | SD Vocal Pitch             |



|            |         |         |         |         |         |         |         |         |         |         |
|------------|---------|---------|---------|---------|---------|---------|---------|---------|---------|---------|
| Log        | -       | -       | -       | -       | -       | -       | -       | -       | -       | -       |
| Likelihood | 1,171.0 | 1,171.5 | 1,171.2 | 1,171.5 | 1,171.3 | 1,171.0 | 1,171.5 | 1,171.6 | 1,171.5 | 1,171.6 |
|            | 71      | 62      | 97      | 60      | 04      | 87      | 66      | 31      | 52      | 33      |

Note: + =  $p < .1$ , \* =  $p < .05$ , \*\* =  $p < .01$ , \*\*\* =  $p < .001$

| Model Number | Behavioral Feature  |
|--------------|---------------------|
| 1            | Mean Vocal Loudness |
| 2            | Mean Vocal Pitch    |
| 3            | Mean Head Pitch     |
| 4            | Mean Head Yaw       |
| 5            | Mean Head Roll      |
| 6            | SD AU01             |
| 7            | SD AU02             |
| 8            | SD AU04             |
| 9            | SD AU05             |
| 10           | SD AU06             |



|            |         |         |         |         |         |         |         |         |         |         |
|------------|---------|---------|---------|---------|---------|---------|---------|---------|---------|---------|
| Log        | -       | -       | -       | -       | -       | -       | -       | -       | -       | -       |
| Likelihood | 1,171.5 | 1,171.6 | 1,170.2 | 1,171.6 | 1,171.5 | 1,171.6 | 1,171.2 | 1,171.5 | 1,171.4 | 1,170.9 |
|            | 93      | 23      | 45      | 30      | 86      | 28      | 52      | 48      | 77      | 86      |

Note: + =  $p < .1$ , \* =  $p < .05$ , \*\* =  $p < .01$ , \*\*\* =  $p < .001$

| Model Number | Behavioral Feature |
|--------------|--------------------|
| 11           | SD AU07            |
| 12           | SD AU09            |
| 13           | SD AU10            |
| 14           | SD AU12            |
| 15           | SD AU14            |
| 16           | SD AU15            |
| 17           | SD AU17            |
| 18           | SD AU20            |
| 19           | SD AU23            |
| 20           | SD AU25            |

**Supplementary Table 9: Mixed-effect regression results for nonverbal behaviors related to trust (Model 21-29)**

|                        | <i>Dependent variable:</i> |                      |                      |                      |                      |                      |                    |                      |                      |
|------------------------|----------------------------|----------------------|----------------------|----------------------|----------------------|----------------------|--------------------|----------------------|----------------------|
|                        | Trustworthiness            |                      |                      |                      |                      |                      |                    |                      |                      |
|                        | 21                         | 22                   | 23                   | 24                   | 25                   | 26                   | 27                 | 28                   | 29                   |
| T2 (Round 1 and 2)     | -0.698***<br>(0.072)       | -0.698***<br>(0.072) | -0.698***<br>(0.072) | -0.697***<br>(0.072) | -0.698***<br>(0.072) | -0.698***<br>(0.072) | -<br>0.757**<br>*  | -0.704***<br>(0.072) | -0.696***<br>(0.071) |
| T3 (After Round 2)     | -0.409***<br>(0.070)       | -0.409***<br>(0.070) | -0.408***<br>(0.070) | -0.408***<br>(0.070) | -0.408***<br>(0.070) | -0.408***<br>(0.070) | -<br>0.307**       | -0.415***<br>(0.070) | -0.412***<br>(0.070) |
| Game Role (Spy = 1)    | -0.018<br>(0.077)          | -0.011<br>(0.077)    | -0.014<br>(0.077)    | -0.013<br>(0.077)    | -0.015<br>(0.077)    | -0.014<br>(0.077)    | -0.017<br>(0.127)  | -0.013<br>(0.077)    | -0.017<br>(0.077)    |
| Gender (Male = 1)      | -0.115*<br>(0.049)         | -0.120*<br>(0.049)   | -0.110*<br>(0.050)   | -0.100*<br>(0.051)   | -0.110*<br>(0.049)   | -0.109*<br>(0.049)   | -0.056<br>(0.072)  | -0.125*<br>(0.049)   | -0.094+<br>(0.049)   |
| Game Experience        | 0.051<br>(0.053)           | 0.047<br>(0.053)     | 0.048<br>(0.053)     | 0.046<br>(0.053)     | 0.049<br>(0.053)     | 0.048<br>(0.053)     | 0.116<br>(0.080)   | 0.048<br>(0.053)     | 0.049<br>(0.053)     |
| Native English Speaker | -0.030<br>(0.055)          | -0.030<br>(0.055)    | -0.029<br>(0.055)    | -0.028<br>(0.055)    | -0.029<br>(0.055)    | -0.029<br>(0.055)    | -0.040<br>(0.079)  | -0.036<br>(0.055)    | -0.030<br>(0.055)    |
| Game Status            | 0.107***<br>(0.016)        | 0.107***<br>(0.016)  | 0.107***<br>(0.016)  | 0.107***<br>(0.016)  | 0.107***<br>(0.016)  | 0.107***<br>(0.016)  | 0.146**<br>*       | 0.107***<br>(0.016)  | 0.107***<br>(0.016)  |
| Behavioral Feature     | 0.020<br>(0.025)           | -0.039<br>(0.025)    | -0.002<br>(0.025)    | -0.016<br>(0.026)    | 0.013<br>(0.025)     | 0.00003<br>(0.025)   | -0.090*<br>(0.037) | 0.051*<br>(0.025)    | 0.054*<br>(0.025)    |
| T2*Game Role           | -0.299**<br>(0.113)        | -0.298**<br>(0.113)  | -0.301**<br>(0.113)  | -0.303**<br>(0.113)  | -0.301**<br>(0.113)  | -0.301**<br>(0.113)  | -0.409*<br>(0.174) | -0.285*<br>(0.113)   | -0.306**<br>(0.113)  |
| T3*Game Role           | -0.990***<br>(0.111)       | -0.991***<br>(0.111) | -0.994***<br>(0.111) | -0.993***<br>(0.111) | -0.995***<br>(0.111) | -0.993***<br>(0.111) | -<br>1.335**<br>*  | -0.976***<br>(0.111) | -0.983***<br>(0.111) |
| Constant               | 3.876***<br>(0.069)        | 3.878***<br>(0.069)  | 3.873***<br>(0.069)  | 3.870***<br>(0.069)  | 3.874***<br>(0.069)  | 3.873***<br>(0.069)  | 3.781**<br>*       | 3.883***<br>(0.069)  | 3.868***<br>(0.069)  |



|                |                    |                    |                    |                    |                    |                    |                  |                    |                    |
|----------------|--------------------|--------------------|--------------------|--------------------|--------------------|--------------------|------------------|--------------------|--------------------|
| Observations   | 1,041              | 1,041              | 1,041              | 1,041              | 1,041              | 1,041              | 487              | 1,041              | 1,041              |
| Log Likelihood | -<br>1,171.31<br>7 | -<br>1,170.40<br>7 | -<br>1,171.63<br>7 | -<br>1,171.45<br>4 | -<br>1,171.50<br>6 | -<br>1,171.63<br>9 | -<br>553.14<br>0 | -<br>1,169.60<br>6 | -<br>1,169.27<br>6 |

Note: + =  $p < .1$ , \* =  $p < .05$ , \*\* =  $p < .01$ , \*\*\* =  $p < .001$

| Model Number | Behavioral Feature                              |
|--------------|-------------------------------------------------|
| 21           | SD AU26                                         |
| 22           | SD AU45                                         |
| 23           | SD Vocal Pitch                                  |
| 24           | SD Head Pitch                                   |
| 25           | SD Head Yaw                                     |
| 26           | SD Head Roll                                    |
| 27           | Speaking Tempo (i.e., Word Count/Speaking Time) |
| 28           | Count of Turn-at-Talk                           |
| 29           | Mean Turn-at-Talk Duration                      |
